# Supplementary material for: Modelling the Evolution of COVID-19 in High-Incidence European Countries and Regions: Estimated Number of Infections and Impact of Past and Future Intervention Measures
Source: MDPI journal article supplement (doi:10.3390/jcm9061825), 2020-06-11
Supplement: s1 [file s1]

## SUPPLEMENTARY DATA

**Table S1.** Parameters (reproduction number and initial infections) obtained by using additional interventions in the modeling

| Country / region | Mean $R_0$ (95% credible interval) | Interventions | Mean $R_t$ after intervention (95% credible interval) | Estimated infections in first 6 days (95% credible interval) |
|------------------|------------------------------------|---------------|-------------------------------------------------------|--------------------------------------------------------------|
| Spain            | 4.80 (4.15-5.51)                   | 14 Mar        | 0.61 (0.53-0.70)                                      | 401 (154-852)                                                |
|                  |                                    | 1-6 Apr       | 0.46 (0.10-0.62)                                      |                                                              |
| La Rioja         | 3.22 (2.38-4.37)                   | 14 Mar        | 0.63 (0.47-0.80)                                      | 78 (9-249)                                                   |
|                  |                                    | 1-6 Apr       | 0.33 (0.02-0.62)                                      |                                                              |
| Iceland          | 1.82 (1.31-2.38)                   | 24 Mar        | 0.34 (0.02-1.05)                                      | 78 (25-171)                                                  |
|                  |                                    | 3 Apr         | 0.20 (0.01-0.61)                                      |                                                              |

## Spain

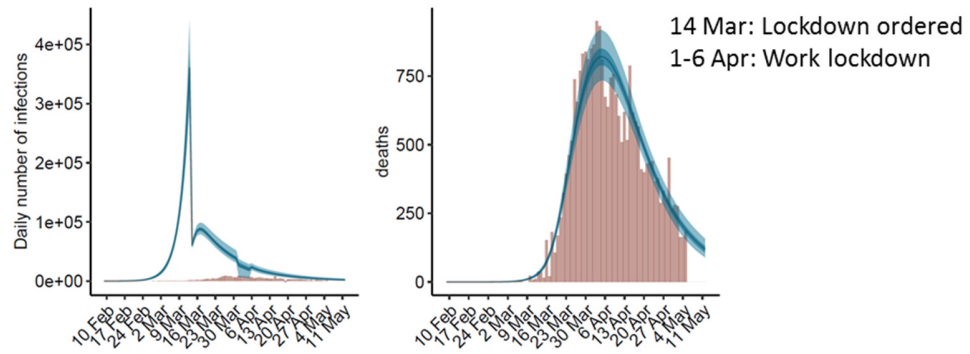

## La Rioja

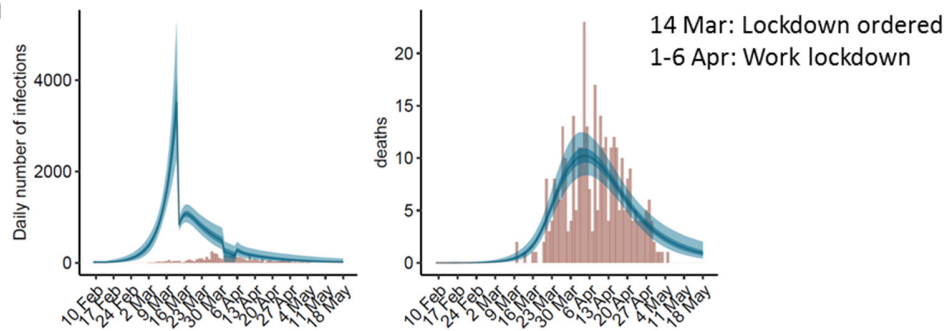

## Iceland

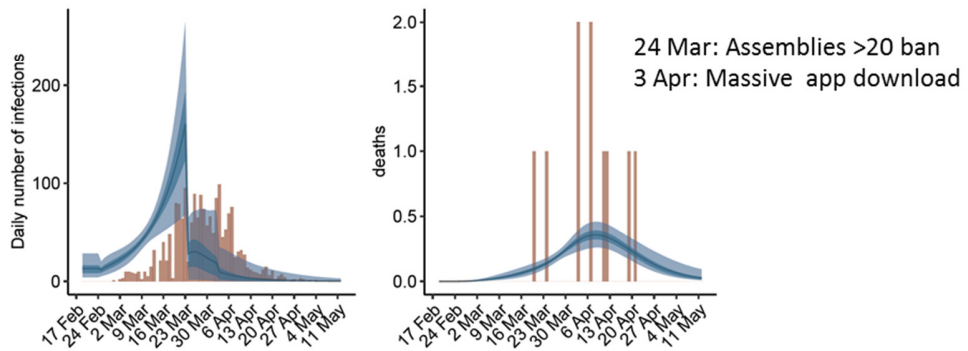

**Figure S1.** Estimates of infections and deaths obtained by including additional interventions dates in the model (Table S1).

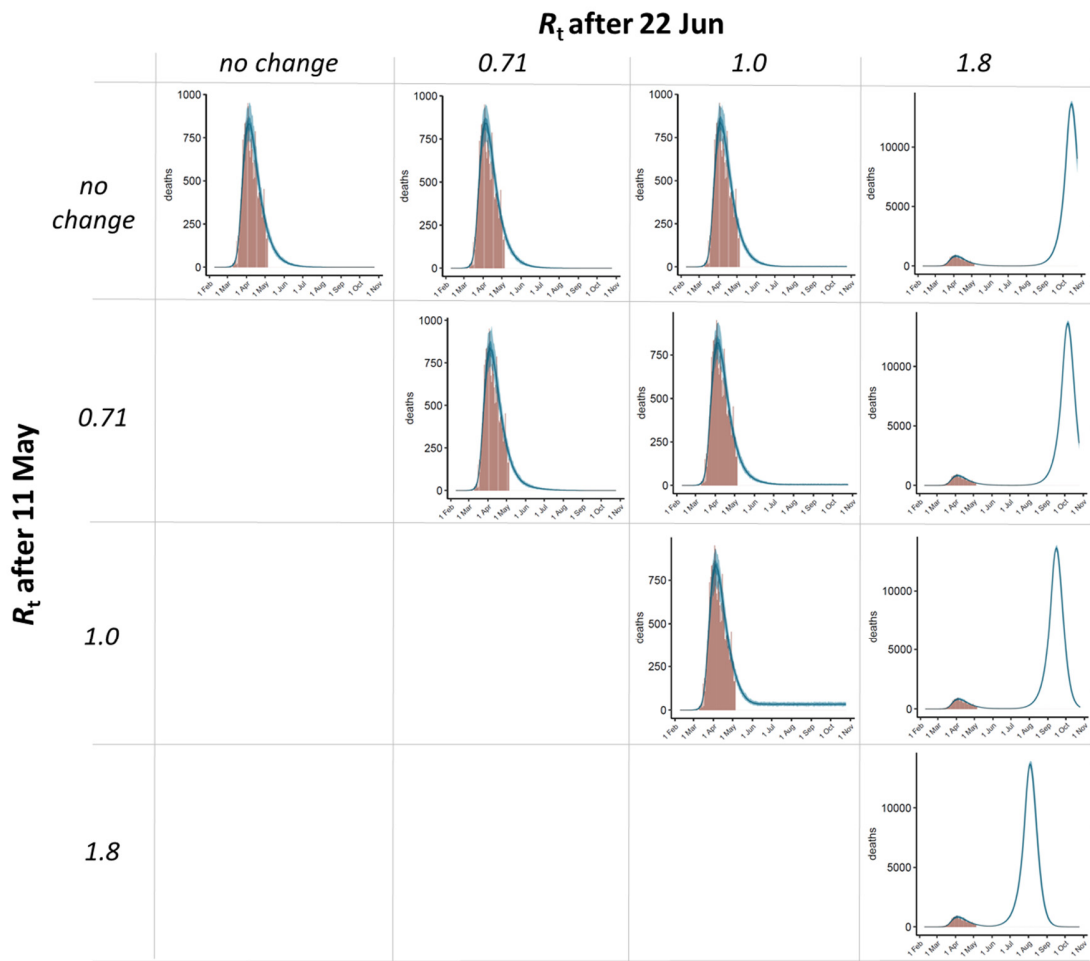

**Figure S2.** Forecast for daily deaths in Spain over the upcoming months in different scenarios. Blue bands (light blue 95% CI; dark blue 50% CI) represent the estimated daily deaths over time, computed as 100 discrete random distributions from sets of parameters obtained by the model ( $R_0$ ,  $R_t$  after main intervention, and initial number of infections; Table 3), for different scenarios depending on possible changes in  $R_t$  after the proposed modifications in the intervention measures in two key dates (11 May and 22 June). Reported deaths to date are represented as brown bars.

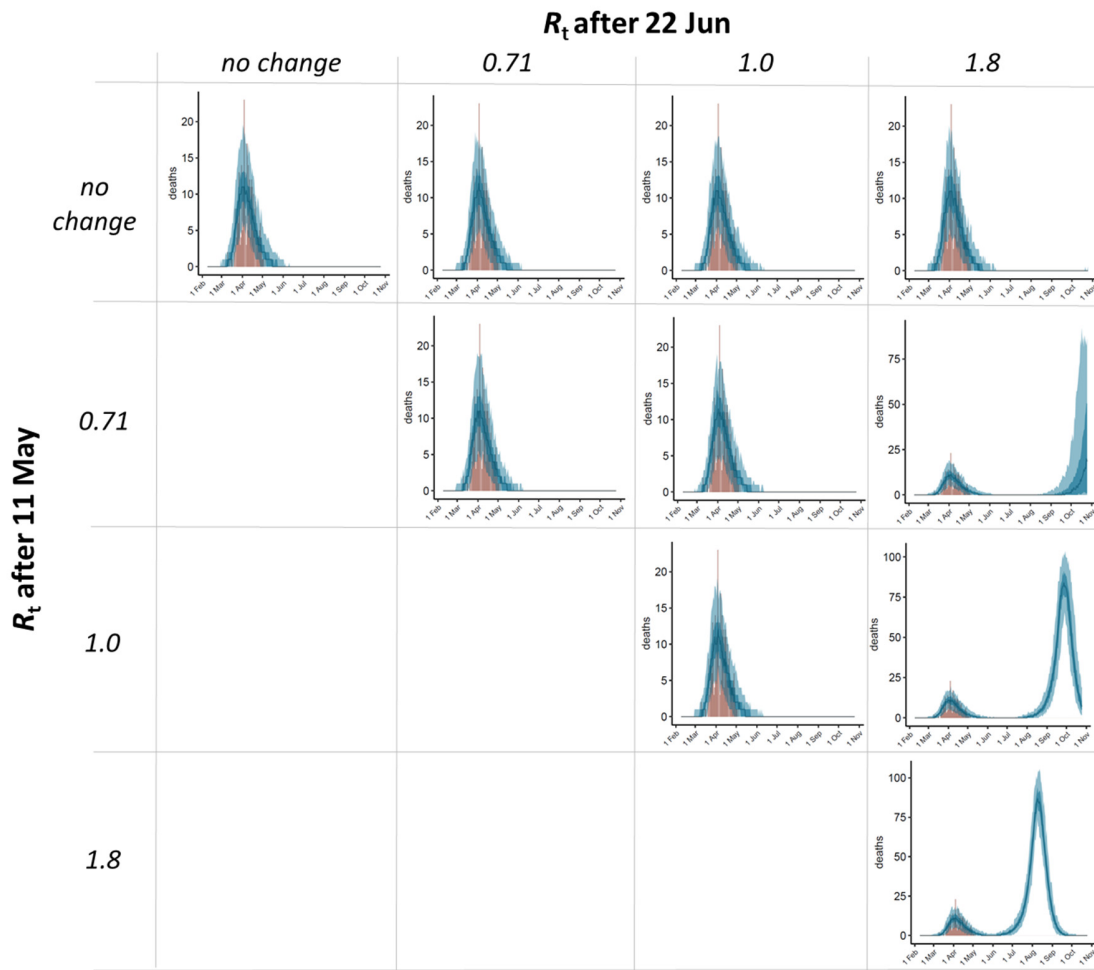

**Figure S3.** Forecast for daily deaths in La Rioja over the upcoming months in different scenarios. Blue bands (light blue 95% CI; dark blue 50% CI) represent the estimated daily deaths over time, computed as 100 discrete random distributions from sets of parameters obtained by the model ( $R_0$ ,  $R_t$  after main intervention, and initial number of infections; Table 3), for different scenarios depending on possible changes in  $R_t$  after the proposed modifications in the intervention measures in two key dates (11 May and 22 June). Reported deaths to date are represented as brown bars.

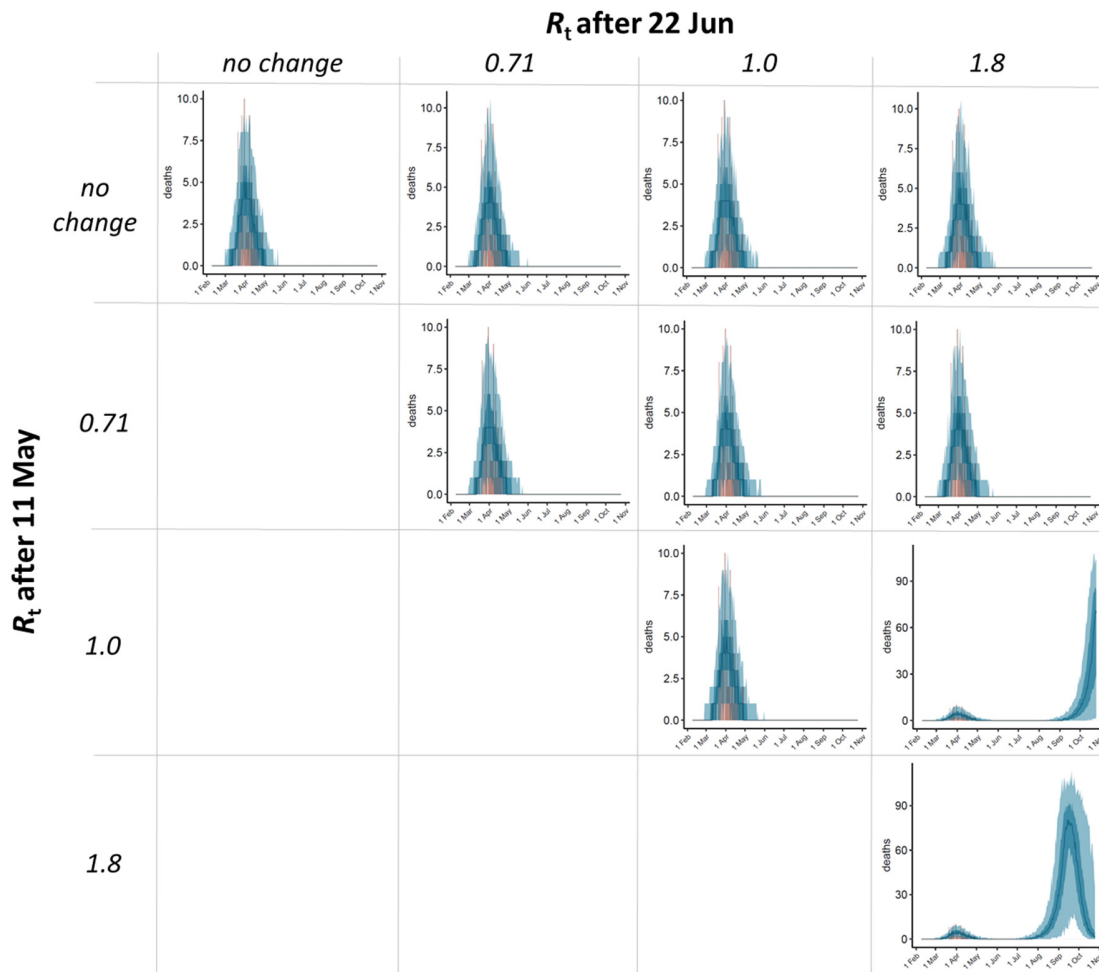

**Figure S4.** Forecast for daily deaths in La Rioja (excluding data from elderly retirement homes with reported cases) over the upcoming months in different scenarios. Blue bands (light blue 95% CI; dark blue 50% CI) represent the estimated daily deaths over time, computed as 100 discrete random distributions from sets of parameters obtained by the model ( $R_0$ ,  $R_t$  after main intervention, and initial number of infections; Table 3), for different scenarios depending on possible changes in  $R_t$  after the proposed modifications in the intervention measures in two key dates (11 May and 22 June). Reported deaths to date are represented as brown bars.

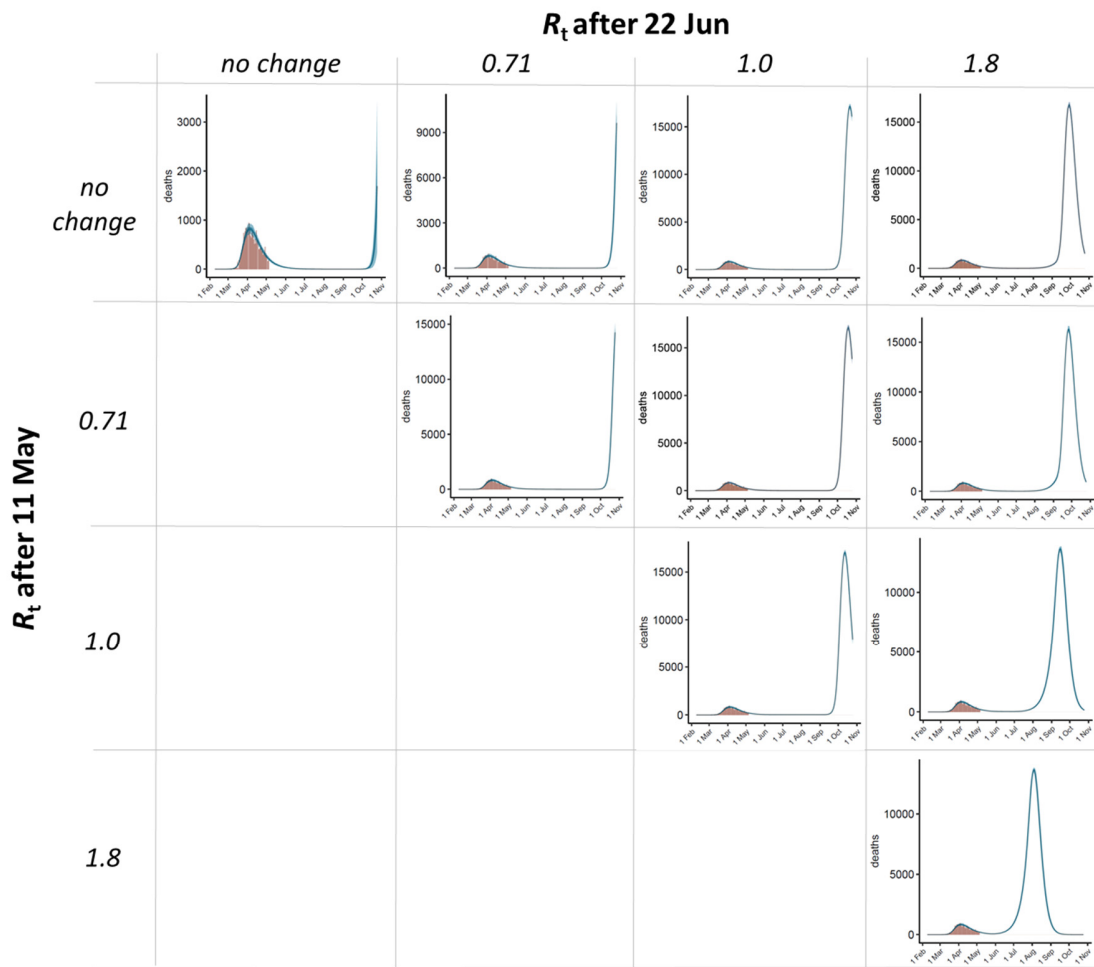

**Figure S5.** Forecast for daily deaths in Spain over the upcoming months in different scenarios, assuming full return to pre-pandemic period on 1 September 2020. Blue bands (light blue 95% CI; dark blue 50% CI) represent the estimated daily deaths over time, computed as 100 discrete random distributions from sets of parameters obtained by the model ( $R_0$ ,  $R_t$  after main intervention, and initial number of infections; Table 3), for different scenarios depending on possible changes in  $R_t$  after the proposed modifications in the intervention measures in two key dates (11 May and 22 June). Reported deaths to date are represented as brown bars.

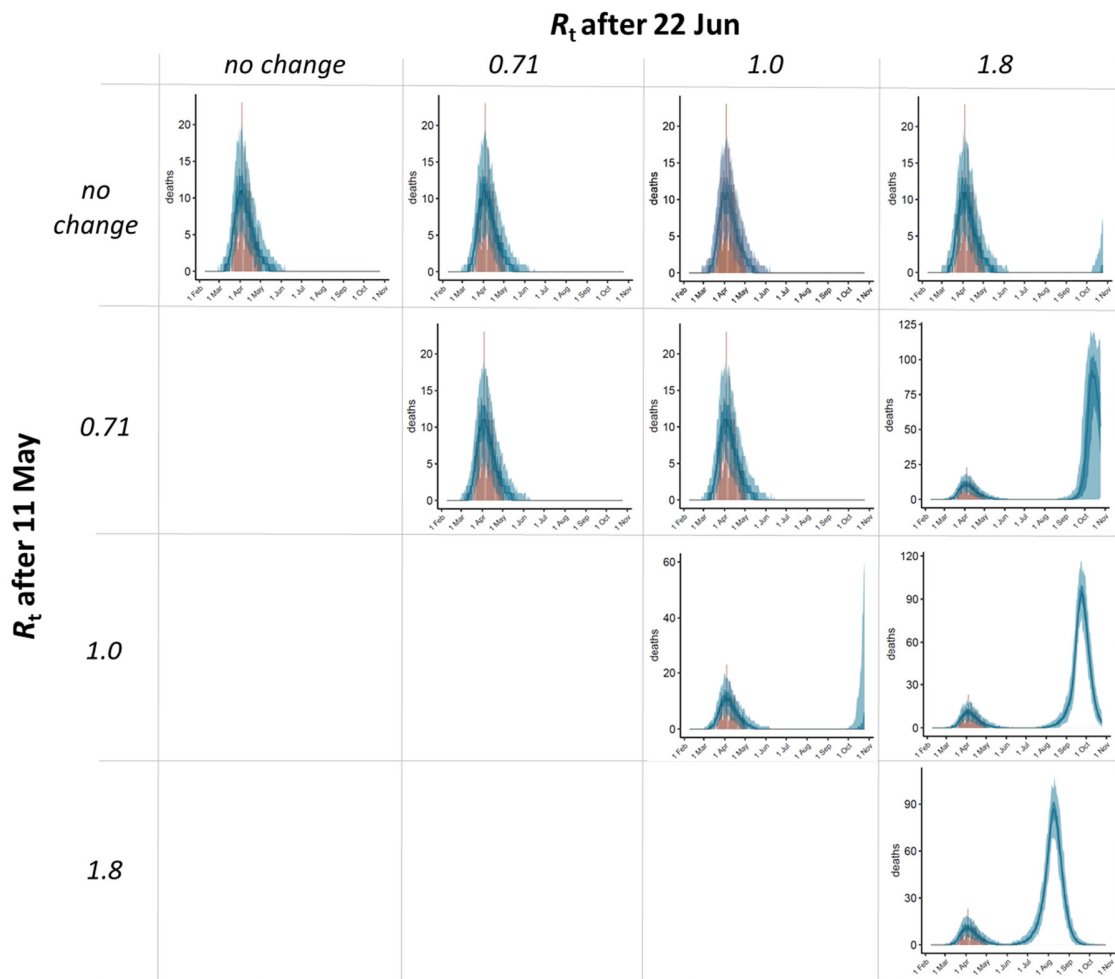

**Figure S6.** Forecast for daily deaths in La Rioja over the upcoming months in different scenarios, assuming full return to pre-pandemic period on 1 September 2020. Blue bands (light blue 95% CI; dark blue 50% CI) represent the estimated daily deaths over time, computed as 100 discrete random distributions from sets of parameters obtained by the model ( $R_0$ ,  $R_t$  after main intervention, and initial number of infections; Table 3), for different scenarios depending on possible changes in  $R_t$  after the proposed modifications in the intervention measures in two key dates (11 May and 22 June). Reported deaths to date are represented as brown bars.

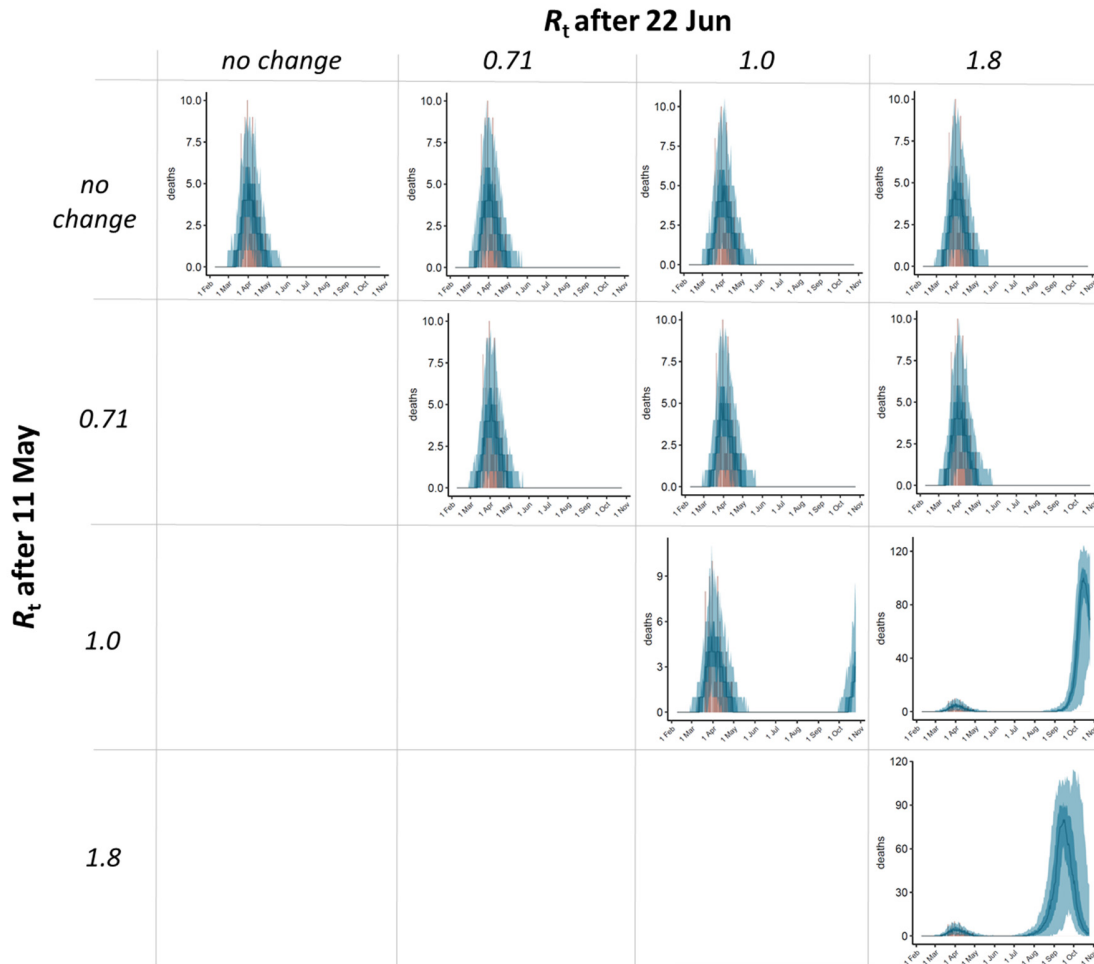

**Figure S7.** Forecast for daily deaths in La Rioja (after excluding data from elderly retirement homes with reported cases) over the upcoming months in different scenarios, assuming full return to pre-pandemic period on 1 September 2020. Blue bands (light blue 95% CI; dark blue 50% CI) represent the estimated daily deaths over time, computed as 100 discrete random distributions from sets of parameters obtained by the model ( $R_0$ ,  $R_t$  after main intervention, and initial number of infections; Table 3), for different scenarios depending on possible changes in  $R_t$  after the proposed modifications in the intervention measures in two key dates (11 May and 22 June). Reported deaths to date are represented as brown bars.
